# Supplementary material for: ATtRACT—a database of RNA-binding proteins and associated motifs
Source: Oxford University Press journal article supplement (doi:10.1093/database/baw035), 2016-01-01
Supplement: baw035_Supplementary_Data.zip [file baw035_Supplementary_Data.zip]

Archive with 2 entries (2 files):
- Supplementary_figure_2.pdf
- supplementary_figure_1.pdf
