# Supplementary material for: ATtRACT—a database of RNA-binding proteins and associated motifs
Source: Oxford University Press journal article supplement (doi:10.1093/database/baw035), 2016-01-01
Supplement: baw035_Supplementary_Data.zip [file baw035_Supplementary_Data.zip › supplementary_figure_1.pdf]

>ENSG00000149187  
UUGUG  
|||||  
UGUGUG  
distance: 1

>ENSG00000149187  
UUGUU  
|||||  
UGUGU  
distance: 2

>ENSG00000149187  
UGUU  
|||||  
UGUGU  
distance: 1

>ENSG00000149187  
UGUGUG  
|||||  
UGUGUG  
distance: 0

>ENSG00000149187  
UGUUU  
|||||  
UGUGU  
distance: 1

>ENSG00000161547  
UCCAGU  
||||||  
UCGAGAU  
distance: 1

>ENSG00000161547  
UGGAGU  
||||||  
UGGAGAU  
distance: 1

>ENSG00000011304  
UCUCU  
|||||  
UCUCU  
distance: 0

>ENSG00000011304  
CUCUCU  
|||||  
CUCUCU  
distance: 0

>ENSG00000011304

CUCU

||||

CUCU

distance: 0

>ENSG000000197111

CCCUAA

|||||||

CCCUUAAA

distance: 1

>ENSG000000197111

CCCU

|||||

CCAUUC

distance: 1

>FBGN0264270 see Hennig,J., Militti,C., Popowicz,G.M., Wang,I.,  
Sonntag,M., Geerlof,A., Gabel,F., Gebauer,F. and Sattler,M. (2014)  
Structural basis for the assembly of the Sxl-Unr translation regulatory  
complex. Nature, 515, 287-290. (see figure 2f )

GUGA

|||||||

UUUUUUU

distance: 6

>FBGN0264270

UGUUUUUUUU

|||||||

UUUUUUUU

distance: 0

>FBGN0264270 see Hennig,J., Militti,C., Popowicz,G.M., Wang,I.,  
Sonntag,M., Geerlof,A., Gabel,F., Gebauer,F. and Sattler,M. (2014)  
Structural basis for the assembly of the Sxl-Unr translation regulatory  
complex. Nature, 515, 287-290.

GCACG

|||||||

UUUUUUU

distance: 7

>FBGN0264270

UUUUUUUGAGCA

|||||||

UUUUUUU

distance: 0

>ENSG000000063244

UUUUUUU

|||||||

UUUUUUC

distance: 1

>ENSG00000063244  
UUUUU  
|||||||  
UUUUUCC  
distance: 0

>ENSG00000234414  
ACAAGAC  
|||||  
CACAA  
distance: 1

>ENSG00000131914  
AGGAGAU  
|||||||  
AGGAGAA  
distance: 1

>ENSG00000138385  
UUUU  
|||||||  
UGCUGUUUU  
distance: 0

>ENSG00000138385  
AUUU  
|||||||  
UGCUGUUUU  
distance: 1

>ENSG00000138385  
UGCUG  
|||||||  
UGCUGUUUU  
distance: 0

>WBGENE00001595  
CUAAC  
|||||||  
AUCUACUCAU  
distance: 2

>WBGENE00001595  
CUACUCAU  
|||||||  
AUCUACUCAU  
distance: 0

>ENSG00000078328  
UGCAUGU  
|||||  
UGCAUG  
distance: 0

>YOR359W see Aviv,T., Lin,Z., Ben-Ari,G., Smibert,C.A. and Sicheri,F.  
(2006) Sequence-specific recognition of RNA hairpins by the SAM domain of  
Vtslp. Nat. Struct. Mol. Biol., 13, 168-176. (figure 3a)

UCUUUGA  
|||||||  
GCUGGUG  
distance: 4

>YOR359W  
CUGGCA  
|||||||  
GCUGGCC  
distance: 1

>XB-GENE-6252591 see Lee,B.M., Xu,J., Clarkson,B.K., Martinez-  
Yamout,M.A., Dyson,H.J., Case,D.A., Gottesfeld,J.M. and Wright,P.E.  
(2006) Induced Fit and 'Lock and Key' Recognition of 5'&#xa0;S {RNA} by  
Zinc Fingers of Transcription Factor {IIIA}. J. Mol. Biol., 357, 275-291.  
(figure 1b left)

CCUGGUUAG  
|||||||  
GGGUGGG  
distance: 5

>XB-GENE-6252591 see Lee,B.M., Xu,J., Clarkson,B.K., Martinez-  
Yamout,M.A., Dyson,H.J., Case,D.A., Gottesfeld,J.M. and Wright,P.E.  
(2006) Induced Fit and 'Lock and Key' Recognition of 5'&#xa0;S {RNA} by  
Zinc Fingers of Transcription Factor {IIIA}. J. Mol. Biol., 357, 275-291.  
(figure 1b right)

CCAUAC  
|||||||  
GGGUGGG  
distance: 6

>ENSG00000147274  
UCAAA  
|||||  
AUCAAA  
distance: 0

>ENSG00000134644  
UGUAAUAUU  
|||||||  
UGUAAUA  
distance: 1

>ENSG00000134644 see Gupta,Y.K., Nair,D.T., Wharton,R.P. and  
Aggarwal,A.K. (2008) Structures of Human Pumilio with Noncognate {RNAs}  
Reveal Molecular Mechanisms for Binding Promiscuity. Structure, 16, 549-  
557.

UUUAAUGUU  
|||||||  
UGUAAUA  
distance: 4

>ENSG00000134644  
UGUAUAUA  
|||||||  
UGUAUAUA  
distance: 0

>ENSG00000134644  
UGUAAAUA  
|||||||  
UGUAAAUA  
distance: 0

>ENSG00000134644  
UGUACAUA  
|||||||  
UGUACAUA  
distance: 0

>ENSG00000134644  
UGUACAUC  
|||||||  
UGUACAUA  
distance: 1

>ENSG00000134644  
UGUAGAUA  
|||||||  
UGUAAAUA  
distance: 1

>ENSG00000134644  
UGUCCAG  
|||||||  
UGUACAUA  
distance: 2

>ENSG00000134644  
UGUACAU  
|||||||  
UGUACAUA  
distance: 0

>ENSG00000134644  
UGUAUAU  
|||||||  
UGUAUAUA  
distance: 0

>ENSG00000066044  
AUUUU  
|||||  
AUUUA  
distance: 1

>ENSG00000066044  
UUUU  
||||  
UUUUU  
distance: 0

>ENSG00000066044  
AUUU  
||||  
AUUUA  
distance: 0

>ENSG00000112531  
ACUAAC  
|||||  
ACUAAC  
distance: 0

>YGL014W  
UGUAU  
|||||||  
UGUAUAUA  
distance: 0

>YGL014W  
UGUAUAUUA  
|||||||  
UGUAUAUUA  
distance: 0

>YGL014W  
UGUAUAUA  
|||||||  
UGUAUAUA  
distance: 0

>ENSG00000070756  
AAAAAAA  
|||||||  
AAAAAAA  
distance: 0

>ENSG00000070756  
AAAAAAA  
|||||||  
AAAAAAA  
distance: 0

>ENSG00000077312  
AUUGCACC  
|||||||  
AUUGCAC  
distance: 0

>ENSG00000077312

AUUGCAC

|||||||

AUUGCAC

distance: 0

>ENSG00000102081 no reference

GCUGC

|||||||

GGACAGG

distance: 4

>YGL044C see Leeper,T.C., Qu,X., Lu,C., Moore,C. and Varani,G. (2010)  
Novel Protein-Protein Contacts Facilitate mRNA 3'-Processing Signal  
Recognition by Rna15 and Hrp1. J. Mol. Biol., 401, 334-349.

AAUAAU

|||||||

UGUUGU

distance: 4

>YGL044C see Leeper,T.C., Qu,X., Lu,C., Moore,C. and Varani,G. (2010)  
Novel Protein-Protein Contacts Facilitate mRNA 3'-Processing Signal  
Recognition by Rna15 and Hrp1. J. Mol. Biol., 401, 334-349.

UAUAUAUA

|||||||

UGUUGU

distance: 5

>ENSG00000162374

UAUUUAUUUA

|||||||

UUUUUUUU

distance: 1

>ENSG00000162374

AUUU

|||||||

UUUUUUU

distance: 1

>ENSG00000113742

CUUUA

|||||||

UUUUUUU

distance: 2

>ENSG00000055917

UGUACAUC

|||||||

UGUACAU

distance: 1

>ENSG00000055917  
UGUAGAUUA  
|||||||  
UGUAGAUUA  
distance: 0

>ENSG00000055917  
UGUAAAUA  
|||||||  
UGUAAAUA  
distance: 0

>YLL013C  
UGUAUAUA  
|||||||  
CAUGUAUAUA  
distance: 0

>YLL013C  
UGUAAAUA  
|||||||  
CAUGUAAAUA  
distance: 0

>YOL123W  
UAUAUAU  
|||||||  
UAUAUAA  
distance: 1

>ENSG00000139910  
UCACC  
|||||  
AUCACC  
distance: 0

>ENSG00000139910  
CAGUCAC  
|||||||  
UCAGUCAC  
distance: 1

>WBGENE00011279 see Kuwasako,K., Takahashi,M., Unzai,S., Tsuda,K.,  
Yoshikawa,S., He,F., Kobayashi,N., Guntert,P., Shirouzu,M., Ito,T., et  
al. (2014) RBFOX and SUP-12 sandwich a G base to cooperatively regulate  
tissue-specific splicing. Nat. Struct. Mol. Biol., 21, 778-786. (results  
and figure 1a)  
GUGUGC  
|||||||  
AGCAUGC  
distance: 3

>WBGENE00011279

UGCAUGG

|||||||

UGCAUGA

distance: 1

>ENSG00000104967 see Lewis,H.A., Musunuru,K., Jensen,K.B., Edo,C.,  
Chen,H., Darnell,R.B. and Burley,S.K. (2000) Sequence-Specific {RNA}  
Binding by a Nova {KH} Domain: Implications for Paraneoplastic Disease  
and the Fragile X Syndrome. Cell, 100, 323-332. (figure 2 complex 1)  
CCUAGAUCAACC

|||||||

AACACC

distance: 5

>ENSG00000104967

GAUACAC

|||||||

AUACAC

distance: 0

>ENSG00000152518

UUUUUUUU

|||||||

UUUUUUUU

distance: 0

>ENSG00000120948

GUGAAUGA

|||||||

GAAUGA

distance: 0

>WBGENE00001402

UGUGUUUAC

|||||||

UGUGUUUAC

distance: 0

>WBGENE00001402

UGUGCCUUA

|||||||

UGUGCCAUU

distance: 1

>WBGENE00001402

UGUAA

|||||||

UGUAAAAC

distance: 0

>WBGENE00001402

UGUACCAUA

|||||

UGUACCAUA

distance: 0

>WBGENE00001402 see Qiu,C., Kershner,A., Wang,Y., Holley,C.P.,

Wilinski,D., Keles,S., Kimble,J., Wickens,M. and Hall,T.M.T. (2012)

Divergence of Pumilio/fem-3 mRNA binding factor (PUF) protein specificity through variations in an RNA-binding pocket. J. Biol. Chem., 287, 6949-6957. (see paragraph An Upstream C Is Required for Tight Binding by FBF)

CAUGUGC

|||||

UGUGUCAUC

distance: 5

>WBGENE00001402 see Wang,Y., Opperman,L., Wickens,M. and Hall,T.M.T.

(2009) Structural basis for specific recognition of multiple mRNA targets by a PUF regulatory protein. Proc. Natl. Acad. Sci. U. S. A., 106, 20186-20191. (figure 2a)

CUGUGC

|||||

UGUGCCAUA

distance: 1

>WBGENE00001402 see Wang,Y., Opperman,L., Wickens,M. and Hall,T.M.T.

(2009) Structural basis for specific recognition of multiple mRNA targets by a PUF regulatory protein. Proc. Natl. Acad. Sci. U. S. A., 106, 20186-20191. (figure 2b)

AUAC

|||||

UGUAAAUC

distance: 3

>WBGENE00001402

UGUGUCAUU

|||||

UGUGUCAUU

distance: 0

>WBGENE00001402

UGUGC

|||||

UGUGCCAUA

distance: 0

>WBGENE00001402

UGUACUAUA

|||||

UGUACUAUA

distance: 0

>ENSG00000048740  
UGUU  
||||  
AUGUU  
distance: 0

>ENSG00000168066  
AUACUAACAA  
|||||||  
UAUACUAACAA  
distance: 0

>ENSMUSG00000003410  
AUUUUUUUU  
|||||  
UUUUUUU  
distance: 1

>ENSG00000136527  
AGAA  
||||  
AAGAA  
distance: 0

>ENSG00000136527  
AGAAC  
|||||  
AAGAAC  
distance: 0

>ENSG00000136450  
UGAAGGAC  
|||||||  
AGAAGGAC  
distance: 1

>WBGENE00006321  
GUGUGC  
|||||||  
AGUGUGA  
distance: 1

>WBGENE00006321  
GUGUG  
|||||||  
AGUGUGA  
distance: 0

>YLR116W  
AUACUAAC  
|||||||  
UACUAAC  
distance: 0

```
>YLR116W
UACUAACA
|||||||
UACUAAC
distance: 0
```

```
>YLR116W
UACUAAC
|||||||
UACUAAC
distance: 0
```
